# Supplementary material
Source: MDPI journal article supplement (https://www.mdpi.com/1999-4907/14/12/2460)
Supplement: s1 [file s1]

# Supplementary Materials

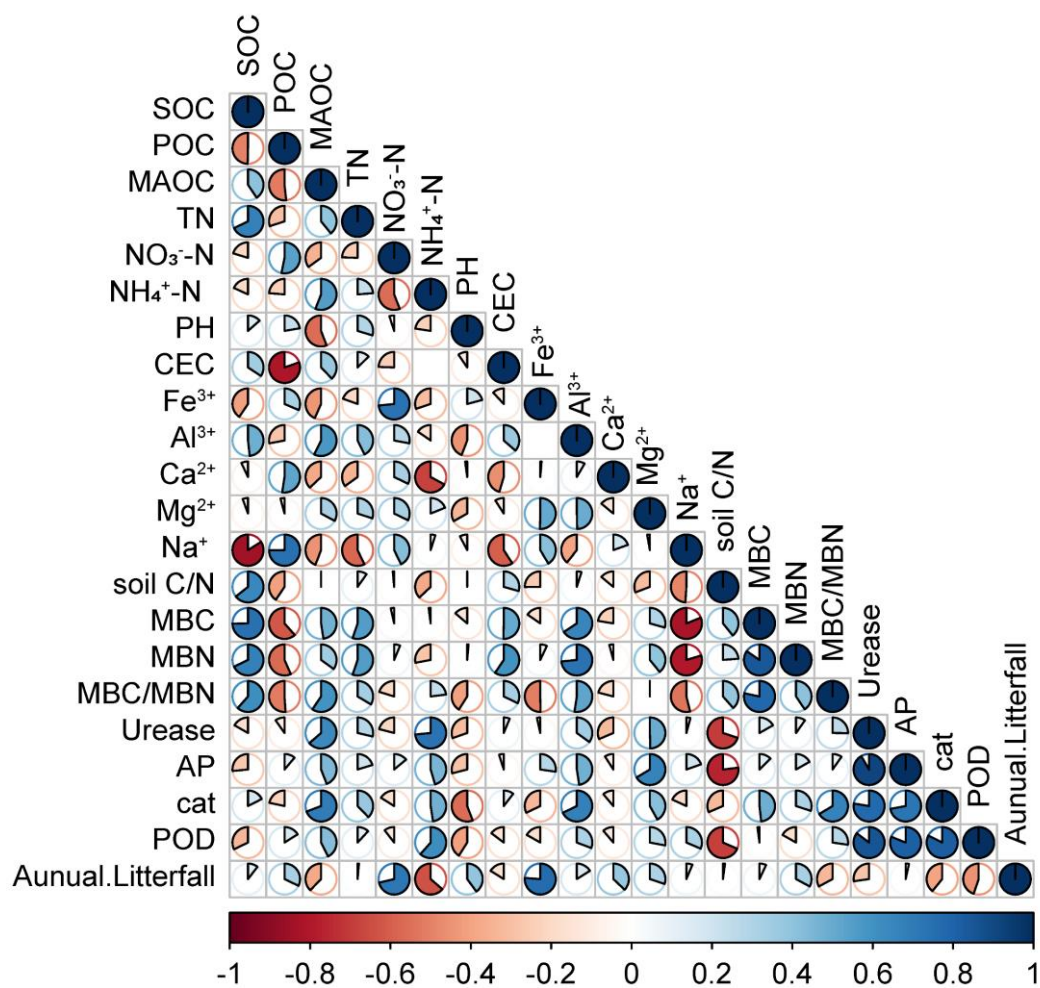

**Figure S1.** Correlation analysis among basic chemical properties, soil microbial biomass and extracellular enzyme activities, and soil organic carbon fractions in Moso bamboo forests under nitrogen application.

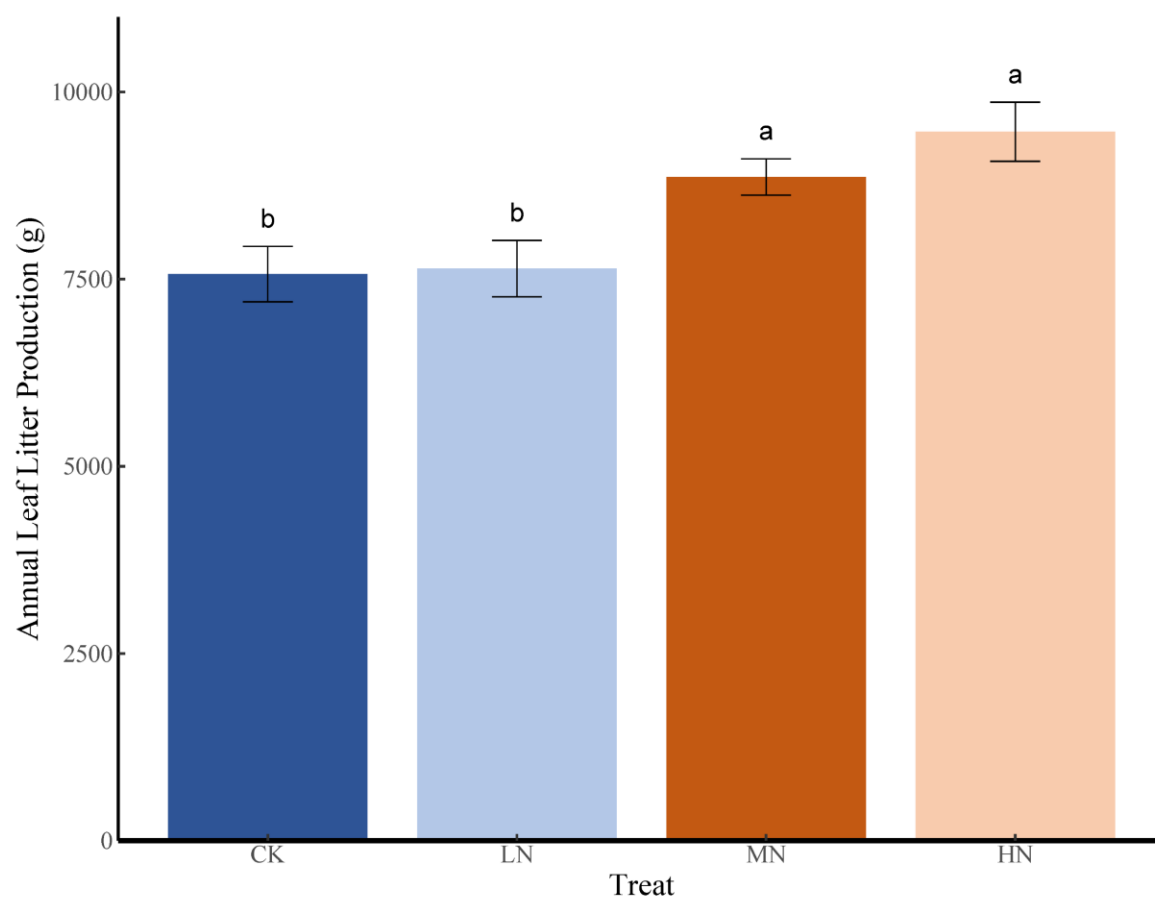

**Figure S2.** Effect of nitrogen application on annual litterfall in Moso bamboo forests. Lowercase letters in each column indicate significant differences ( $p < 0.05$ ) between the different nitrogen application treatments (CK, LN, MN, and HN).
